# Supplementary material for: Circulating miR-141 and miR-375 are associated with treatment outcome in metastatic castration resistant prostate cancer
Source: PubMed Central journal article supplement (PMC6959345; doi:10.1038/s41598-019-57101-7), 2020-01-14
Supplement: 41598_2019_57101_MOESM1_ESM.pdf [file 41598_2019_57101_MOESM1_ESM.pdf]

# **Circulating miR-141 and miR-375 are associated with treatment outcome in metastatic castration resistant prostate cancer**

**A. H. Zedan, P. J. S. Osther, J. Assenholt, J. S. Madsen, T. F. Hansen**

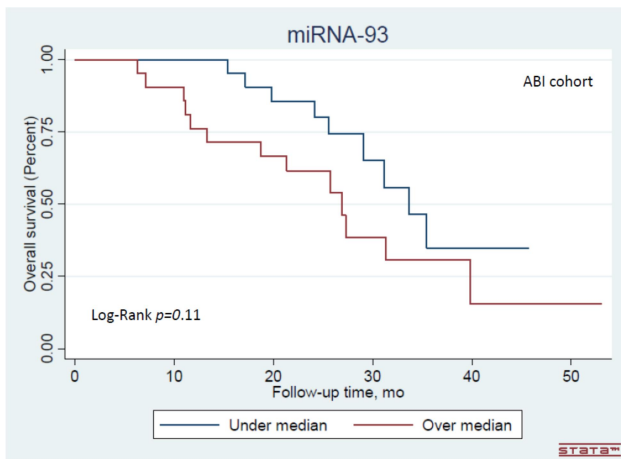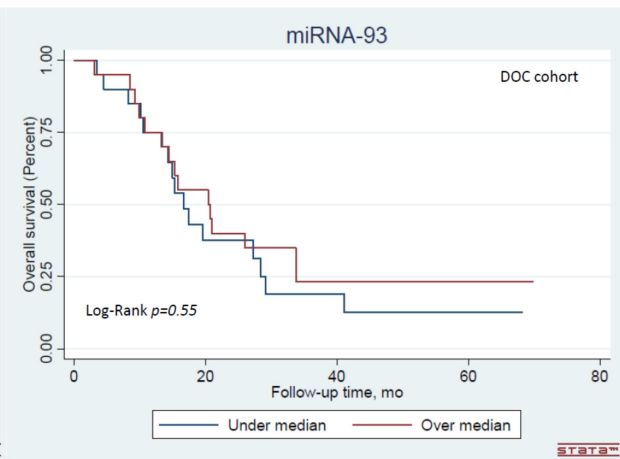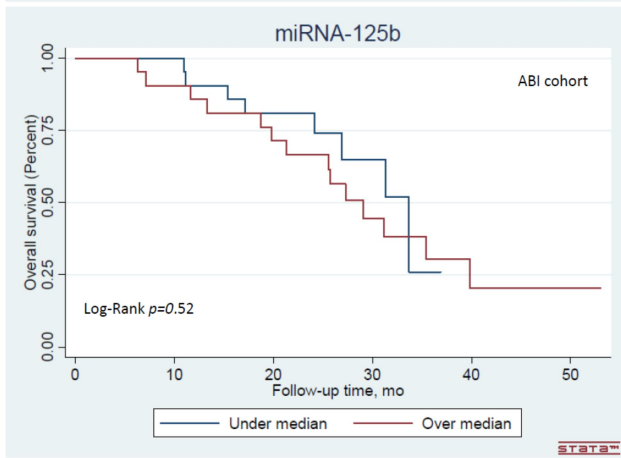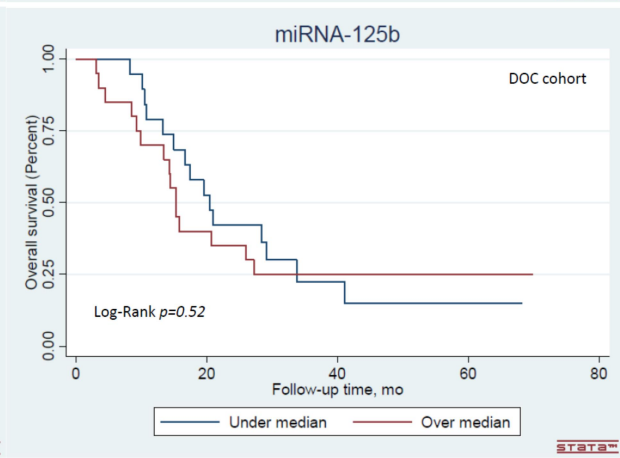

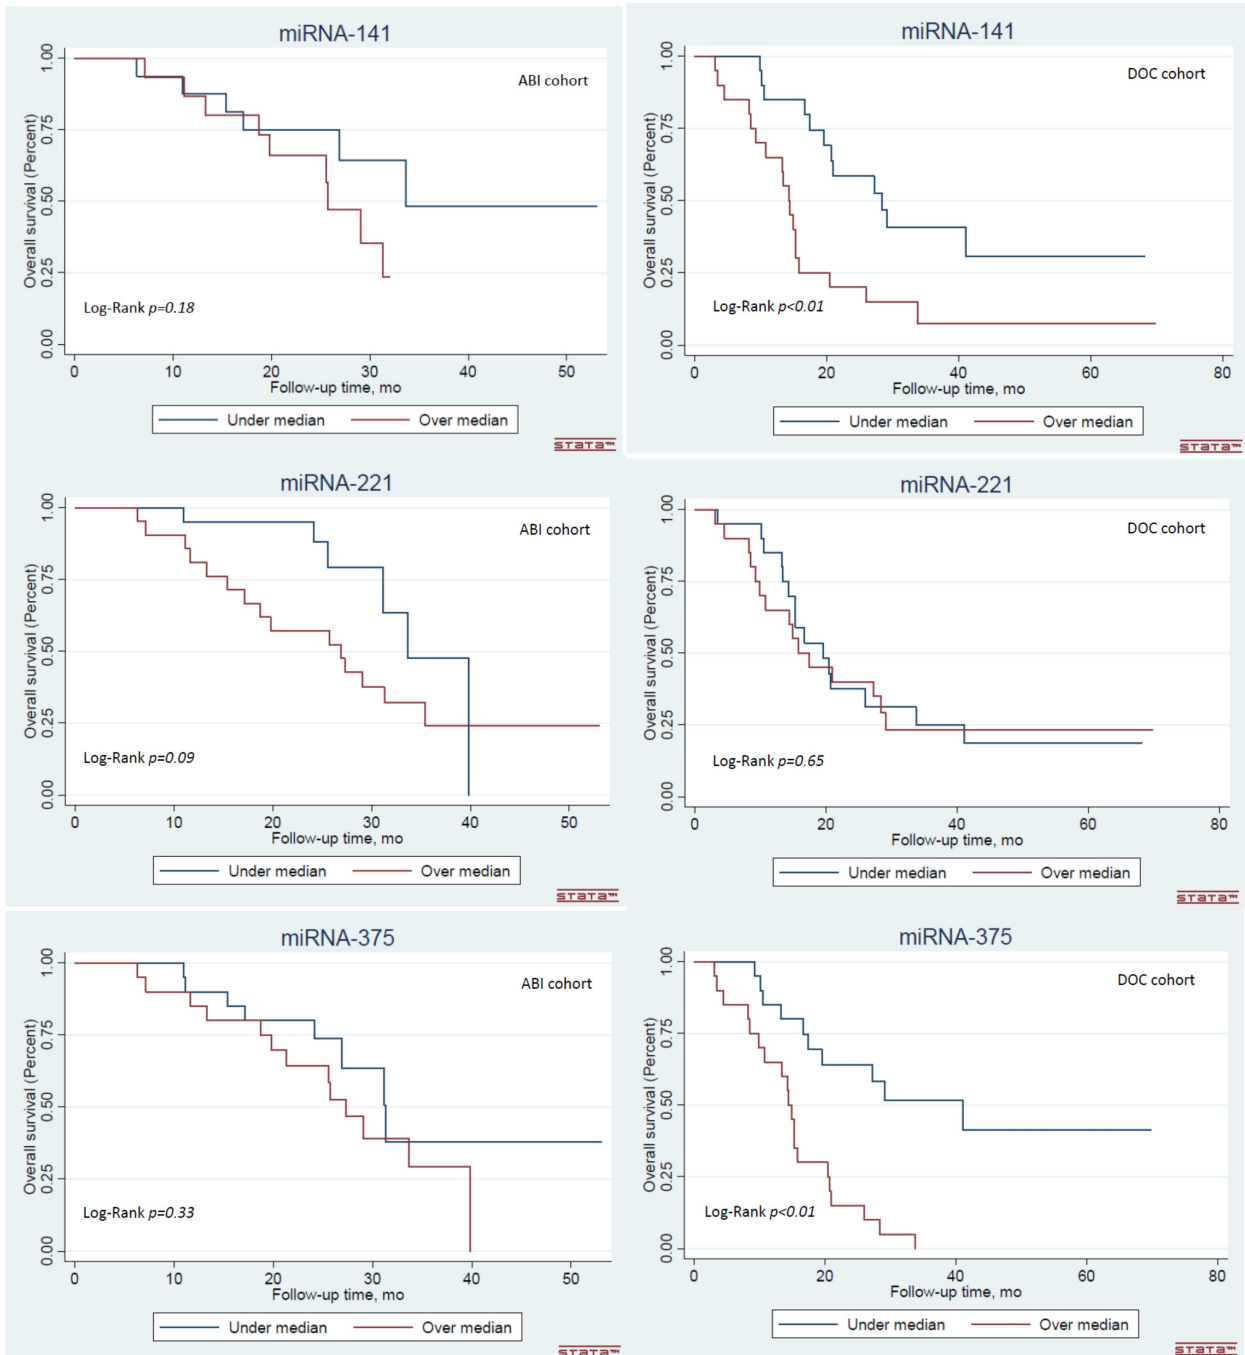

Figure S1: miR-based overall survival analysis in the abiraterone (ABI) and docetaxel (DOC) cohorts

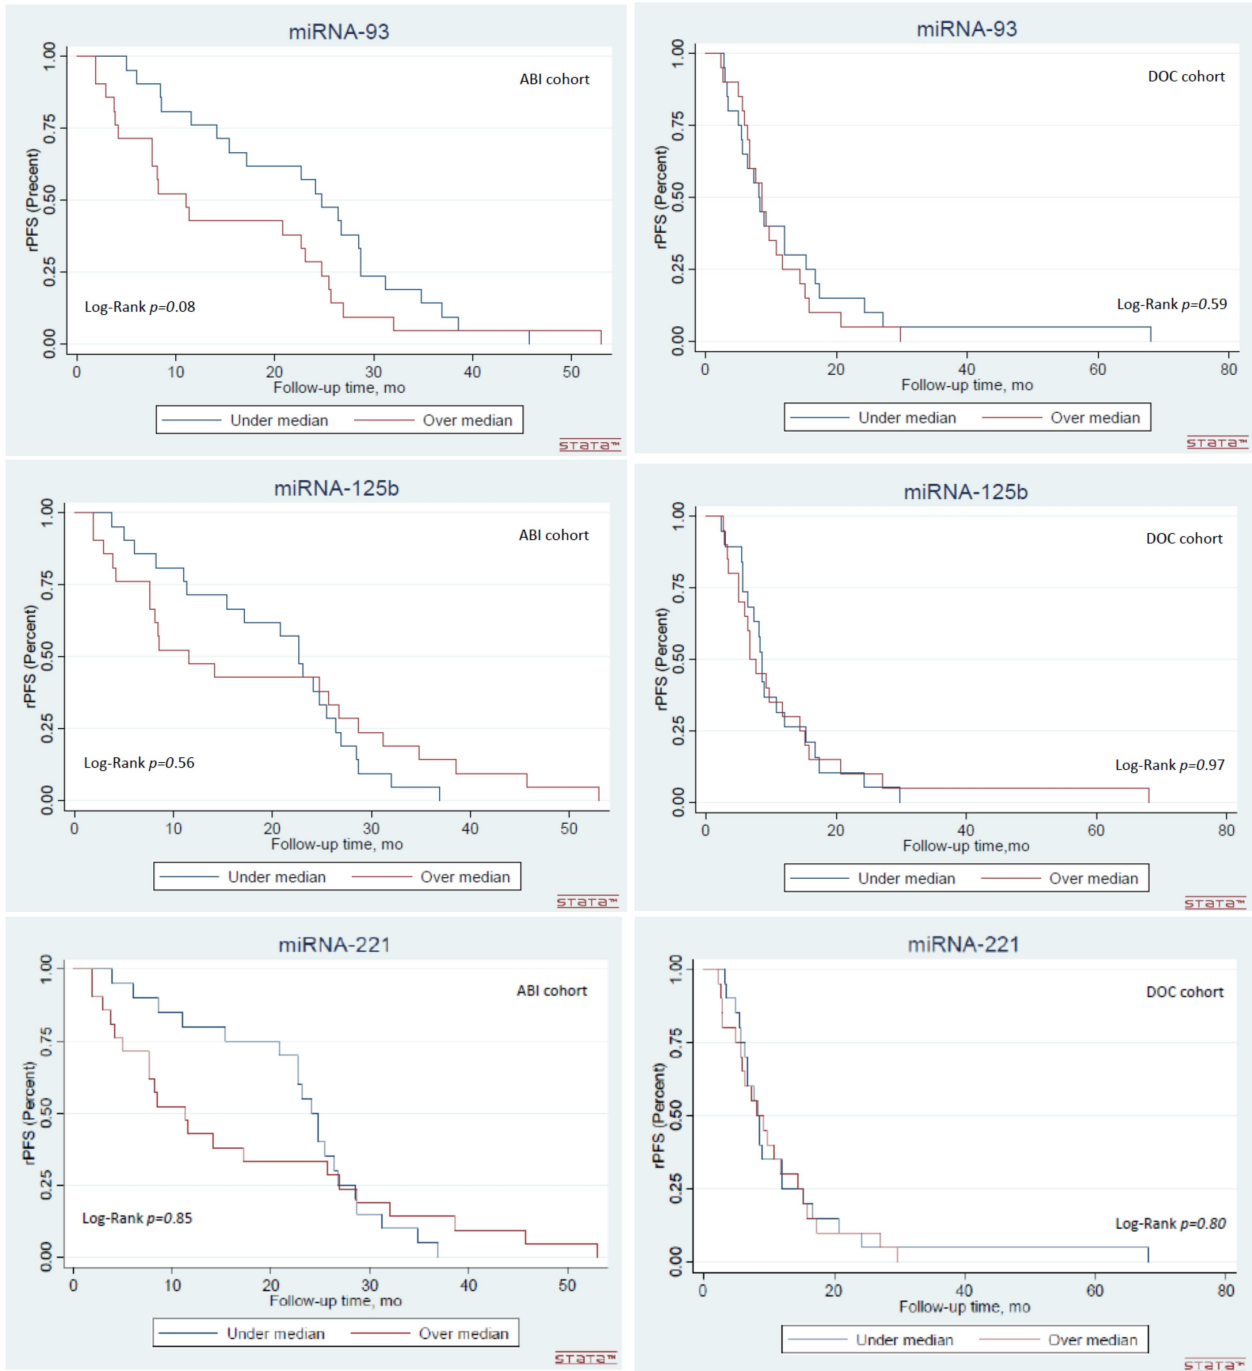

Figure S2: miR-based radiological progression-free survival analysis in the abiraterone (ABI) and docetaxel (DOC) cohorts
