# Supplementary material for: Circulating miR-141 and miR-375 are associated with treatment outcome in metastatic castration resistant prostate cancer
Source: PubMed Central journal article supplement (PMC6959345; doi:10.1038/s41598-019-57101-7), 2020-01-14
Supplement: 41598_2019_57101_MOESM2_ESM.pdf [file 41598_2019_57101_MOESM2_ESM.pdf]

# **Circulating miR-141 and miR-375 are associated with treatment outcome in metastatic castration resistant prostate cancer**

**A. H. Zedan, P. J. S. Osther, J. Assenholt, J. S. Madsen, T. F. Hansen**

**Table S1: Difference in baseline plasma miRs between ABI and DOC cohort**

| Baseline miR  | Z-score      | p-value         |
|---------------|--------------|-----------------|
| miR-93-5p     | <b>-3,45</b> | <b>&lt;0.01</b> |
| miR-125b-1-5p | <b>3.66</b>  | <b>&lt;0.01</b> |
| miR-141-3p    | -1,81        | 0.07            |
| miR-375-3p    | 0.50         | 0,62            |
| miR-221-3p    | <b>-4,87</b> | <b>&lt;0.01</b> |

ABI: abiraterone; DOC: docetaxel. Statistically significant values are in bold writing
