# Supplementary material for: Circulating miR-141 and miR-375 are associated with treatment outcome in metastatic castration resistant prostate cancer
Source: PubMed Central journal article supplement (PMC6959345; doi:10.1038/s41598-019-57101-7), 2020-01-14
Supplement: 41598_2019_57101_MOESM3_ESM.pdf [file 41598_2019_57101_MOESM3_ESM.pdf]

# **Circulating miR-141 and miR-375 are associated with treatment outcome in metastatic castration resistant prostate cancer**

**A. H. Zedan, P. J. S. Osther, J. Assenholt, J. S. Madsen, T. F. Hanse**

**Table S2: The association of baseline circulating miRs with OS and rPFS as demonstrated by Kaplan-Meier survival curves**

|               | ABI cohort      |                 | DOC cohort      |                 |
|---------------|-----------------|-----------------|-----------------|-----------------|
|               | rPFS            | OS              | rPFS            | OS              |
|               | <i>p</i> -value | <i>p</i> -value | <i>p</i> -value | <i>p</i> -value |
| miR-93-5p     | 0.08            | 0.11            | 0.59            | 0.55            |
| miR-125b-1-5p | 0.56            | 0.52            | 0.97            | 0.52            |
| miR-141-3p    | <b>0.03</b>     | 0.18            | <b>&lt;0.01</b> | <b>&lt;0.01</b> |
| miR-375-3p    | 0.12            | 0.33            | <b>&lt;0.01</b> | <b>&lt;0.01</b> |
| miR-221-3p    | 0.85            | 0.09            | 0.801           | 0.65            |

ABI: abiraterone; DOC: docetaxel. Statistically significant values are in bold writing
