# Supplementary material for: Circulating miR-141 and miR-375 are associated with treatment outcome in metastatic castration resistant prostate cancer
Source: PubMed Central journal article supplement (PMC6959345; doi:10.1038/s41598-019-57101-7), 2020-01-14
Supplement: 41598_2019_57101_MOESM6_ESM.pdf [file 41598_2019_57101_MOESM6_ESM.pdf]

# **Circulating miR-141 and miR-375 are associated with treatment outcome in metastatic castration resistant prostate cancer**

**A. H. Zedan, P. J. S. Osther, J. Assenholt, J. S. Madsen, T. F. Hansen**

**Table S5a: Missed Ct values and Ct values above 37 in the ABI and DOC cohorts**

|                      |                | ABI cohort |               |             | DOC cohort |               |             |
|----------------------|----------------|------------|---------------|-------------|------------|---------------|-------------|
|                      |                | Baseline   | After 1 cycle | Progression | Baseline   | After 1 cycle | Progression |
| <b>miR-93-5p</b>     | Missed value   | 0          | 1             | 0           | 0          | 1             | 0           |
|                      | Values over 37 | 0          | 2             | 3           | 0          | 0             | 1           |
| <b>miR-125b-1-5p</b> | Missed value   | 1          | 1             | 0           | 1          | 0             | 2           |
|                      | Values over 37 | 5          | 7             | 6           | 4          | 2             | 0           |
| <b>miR-141-3p</b>    | Missed value   | 13         | 15            | 5           | 0          | 3             | 1           |
|                      | Values over 37 | 1          | 3             | 1           | 2          | 2             | 0           |
| <b>miR-221-3p</b>    | Missed value   | 1          | 2             | 1           | 0          | 2             | 1           |
|                      | Values over 37 | 3          | 8             | 1           | 0          | 0             | 0           |
| <b>miR-375-3p</b>    | Missed value   | 2          | 3             | 5           | 0          | 3             | 2           |
|                      | Values over 37 | 5          | 4             | 3           | 2          | 6             | 3           |

ABI: abiraterone; DOC: docetaxel
